# Supplementary material
Source: publisher figshare collection journal article supplement (https://acs.figshare.com/ndownloader/files/22150755)
Supplement: Supplementary file 1 [file 22150755]

# Continuous flow conditions for high temperature formation of a benzodioxan pharmaceutical intermediate: Rapid scaleup for early phase material delivery

## *AUTHOR NAMES*

*Pengbin Li,<sup>i</sup> Shaohui Yang,<sup>i</sup> Ruiheng Zhu,<sup>i</sup> Baoquan Sun,<sup>i</sup> Zhongbo Li,<sup>i</sup> Ping Huang,<sup>i</sup> Jonas Y. Buser,<sup>ii</sup> Jose Miguel Minguez,<sup>iii</sup> Sarah J. Ryan<sup>\*ii</sup>*

## AUTHOR ADDRESS

<sup>i</sup>) Shanghai SynTheAll Pharmaceutical Co., Ltd. ("STA"), No. 7 Building, #90 Delin Rd, WaiGaoQiao Free Trade Zone, Shanghai, 200131, People's Republic of China

<sup>ii</sup>) Eli Lilly and Company, Small Molecule Design and Development (SMDD), Lilly Technology Center North, 1223 W. Morris St, Indianapolis, IN, 46221

<sup>iii</sup>) Eli Lilly and Company, Discovery Chemistry Research and Technologies (DCRT), Avda. de la Industria 30, 28108 Alcobendas, Madrid, Spain.

## Index

|                                                                                                                     |    |
|---------------------------------------------------------------------------------------------------------------------|----|
| 1. $^1\text{H}$ NMR and $^{13}\text{C}$ NMR.....                                                                    | 3  |
| 1) 1-(4-((3,4-dichlorobenzyl)oxy)phenyl)ethan-1-one (3).....                                                        | 3  |
| 2) 2-Bromo-1(4-((3,4-dichlorobenzyl)oxy)phenyl)ethan-1-one (4).....                                                 | 5  |
| 3) 3-(2-(4-((3,4-dichlorobenzyl)oxy)phenyl)-2-oxoethoxy)-4-fluorobenzonitrile<br>(6).....                           | 7  |
| 4) ( <i>S</i> )-3-(2-(4-((3,4-dichlorobenzyl)oxy)-2-hydroxyethoxy)-4-fluorobenzonitrile<br>(2).....                 | 9  |
| 5) ( <i>S</i> )-2-(4-((3,4-dichlorobenzyl)oxy)phenyl)-2,3-dihydrobenzo [b][1,4]dioxine-<br>6-carbonitrile (1) ..... | 11 |
| 2. Chromatogram of the racemate and the enantiomerically pure compound                                              | 13 |
| 1) ( <i>S</i> )-3-(2-(4-((3,4-dichlorobenzyl)oxy)-2-hydroxyethoxy)-4-fluorobenzonitrile<br>(2).....                 | 13 |
| 2) ( <i>S</i> )-2-(4-((3,4-dichlorobenzyl)oxy)phenyl)-2,3-dihydrobenzo [b][1,4]dioxine-<br>6-carbonitrile (1) ..... | 15 |
| 3. Characterization of regioisomer 1b .....                                                                         | 17 |
| 4. Safety Analysis of the high temperature $\text{S}_{\text{N}}\text{Ar}$ Cyclization Conditions .....              | 23 |

|                                                                                     |    |
|-------------------------------------------------------------------------------------|----|
| 5. Port Connector reactors for Small Scale Screening of High Temperature Conditions |    |
| .....                                                                               | 24 |

# 1. <sup>1</sup>H NMR and <sup>13</sup>C NMR

## 1) 1-(4-((3,4-dichlorobenzyl)oxy)phenyl)ethan-1-one (3)

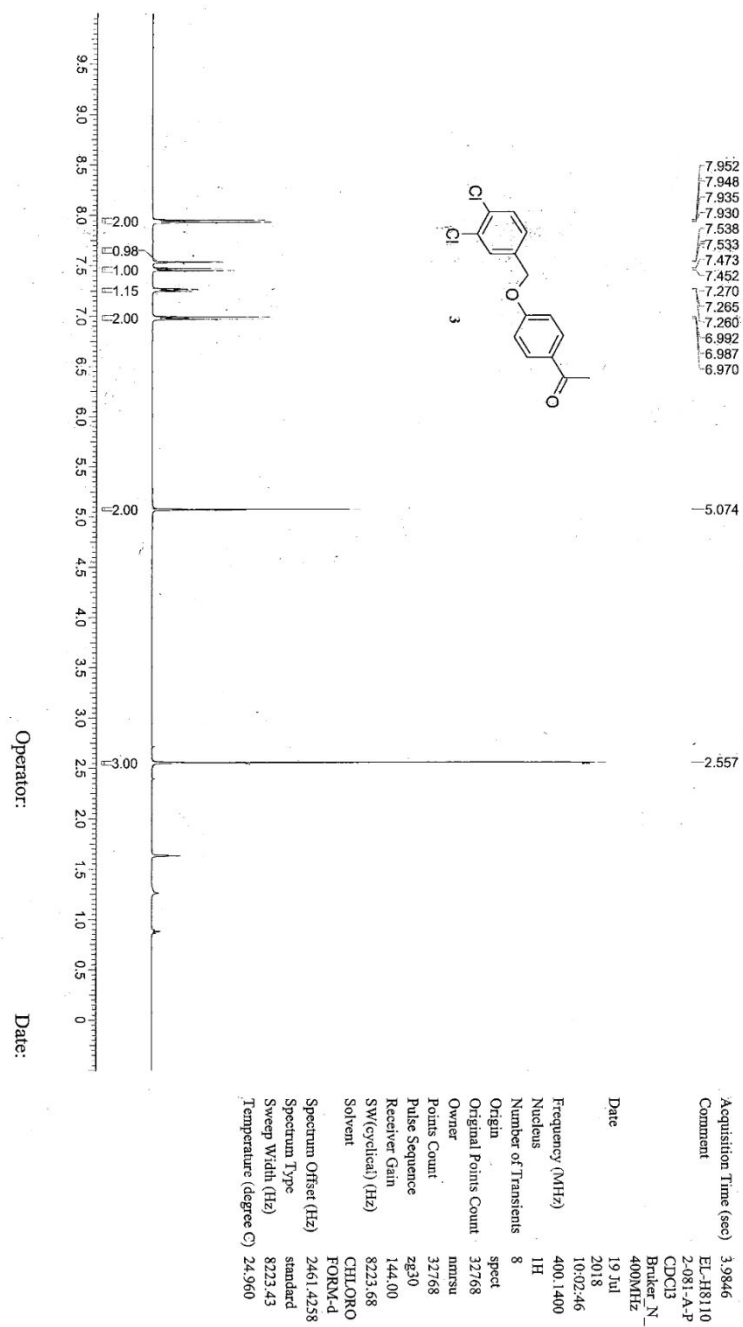

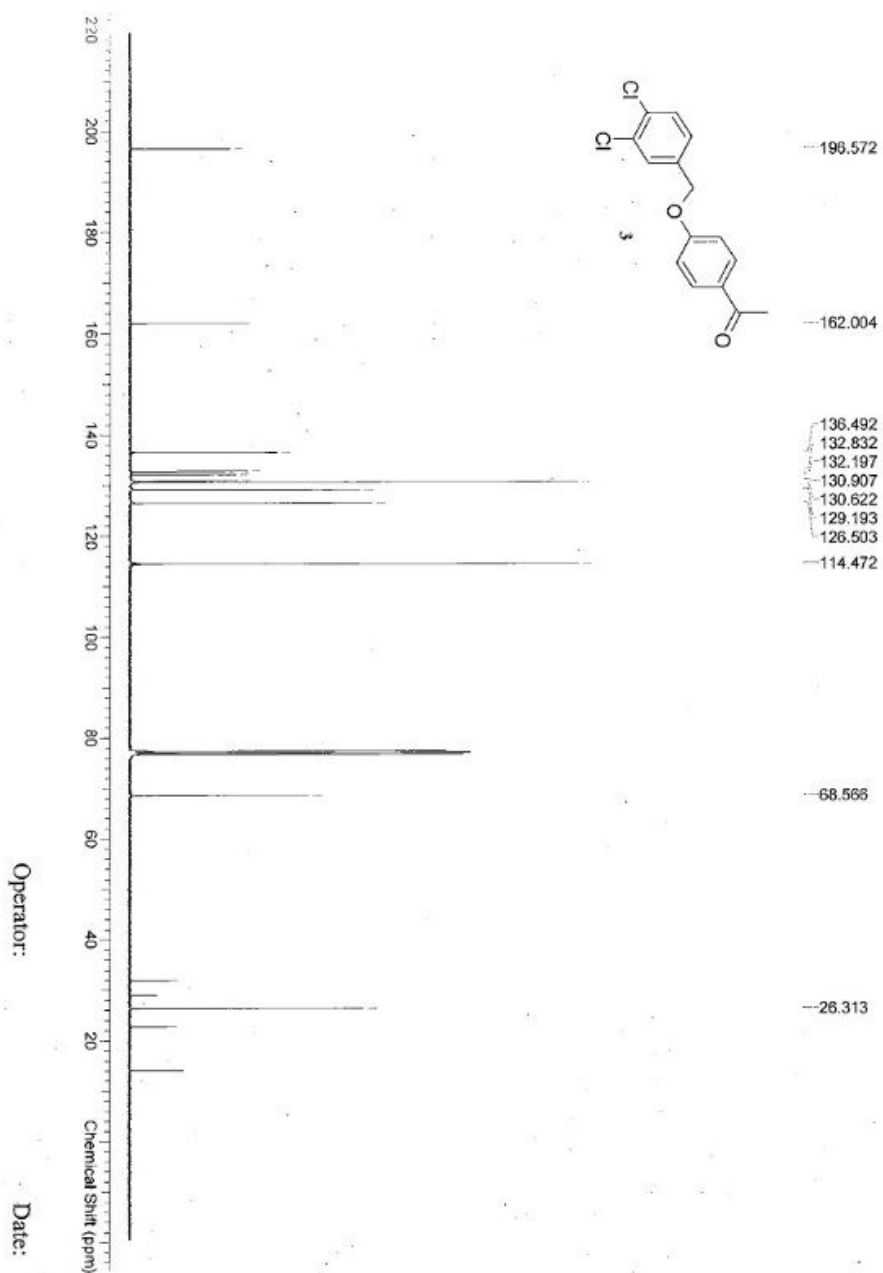

Operator:

Date:

|                        |           |
|------------------------|-----------|
| Acquisition Time (sec) | 1.3631    |
| Comment                | EL-H7169  |
|                        | 2-055-A-P |
|                        | CDCl3     |
|                        | 13C       |
| Date                   | 19 Mar    |
|                        | 2019      |
|                        | 23:04:15  |
| Frequency (MHz)        | 100.6128  |
| Nucleus                | 13C       |
| Number of Transients   | 1024      |
| Origin                 | spect     |
| Original Points Count  | 32768     |
| Owner                  | NMRSU     |
| Points Count           | 32768     |
| Pulse Sequence         | zgpg30    |
| Receiver Gain          | 2050.00   |
| SW(cyclical) (Hz)      | 24038.46  |
| Solvent                | CHLORO    |
|                        | FORM-d    |
| Spectrum Offset (Hz)   | 10060.804 |
|                        | 7         |
| Spectrum Type          | standard  |
| Sweep Width (Hz)       | 24037.73  |
| Temperature (degree C) | 27.000    |

## 2) 2-Bromo-1(4-((3,4-dichlorobenzyl)oxy)phenyl)ethan-1-one (4)

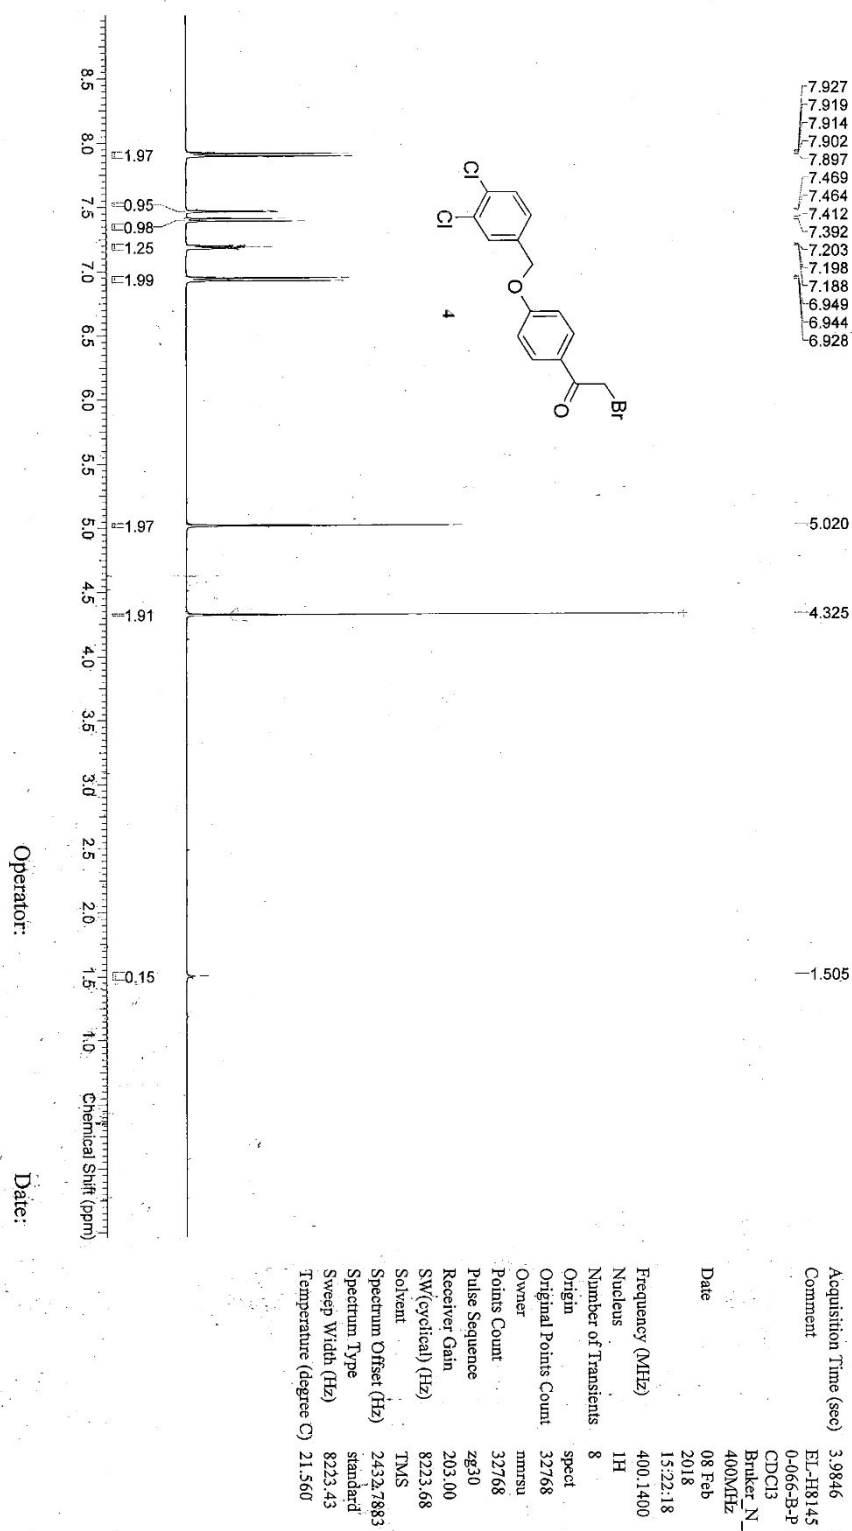

189.857  
162.660  
136.207  
132.934  
132.380  
131.417  
130.717  
129.244  
127.524  
126.510  
114.837

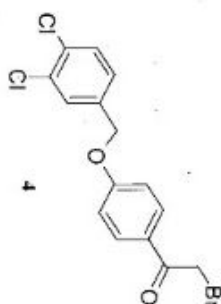

68.705  
30.579

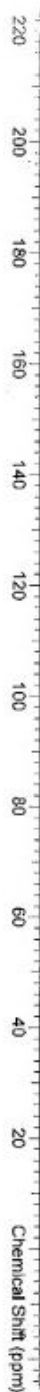

Operator:

Date:

Acquisition Time (sec) 1.3631  
Comment EL-H7169  
2-055-B-P  
CDCl3  
13C  
Date 20 Mar 2019  
Frequency (MHz) 100.6128  
Nucleus 13C  
Number of Transients 1024  
Origin spect  
Original Points Count 32768  
Owner NMRSU  
Points Count 32768  
Pulse Sequence zgpg30  
Receiver Gain 2050.00  
SW (cyclical) (Hz) 24038.46  
Solvent CHLORO  
FORM-d  
Spectrum Offset (Hz) 10060.804  
Spectrum Type standard  
Sweep Width (Hz) 24037.73  
Temperature (degree C) 27.000

**3) 3-(2-(4-((3,4-dichlorobenzyl)oxy)phenyl-2-oxoethoxy)-4-fluorobenzonitrile (6)**

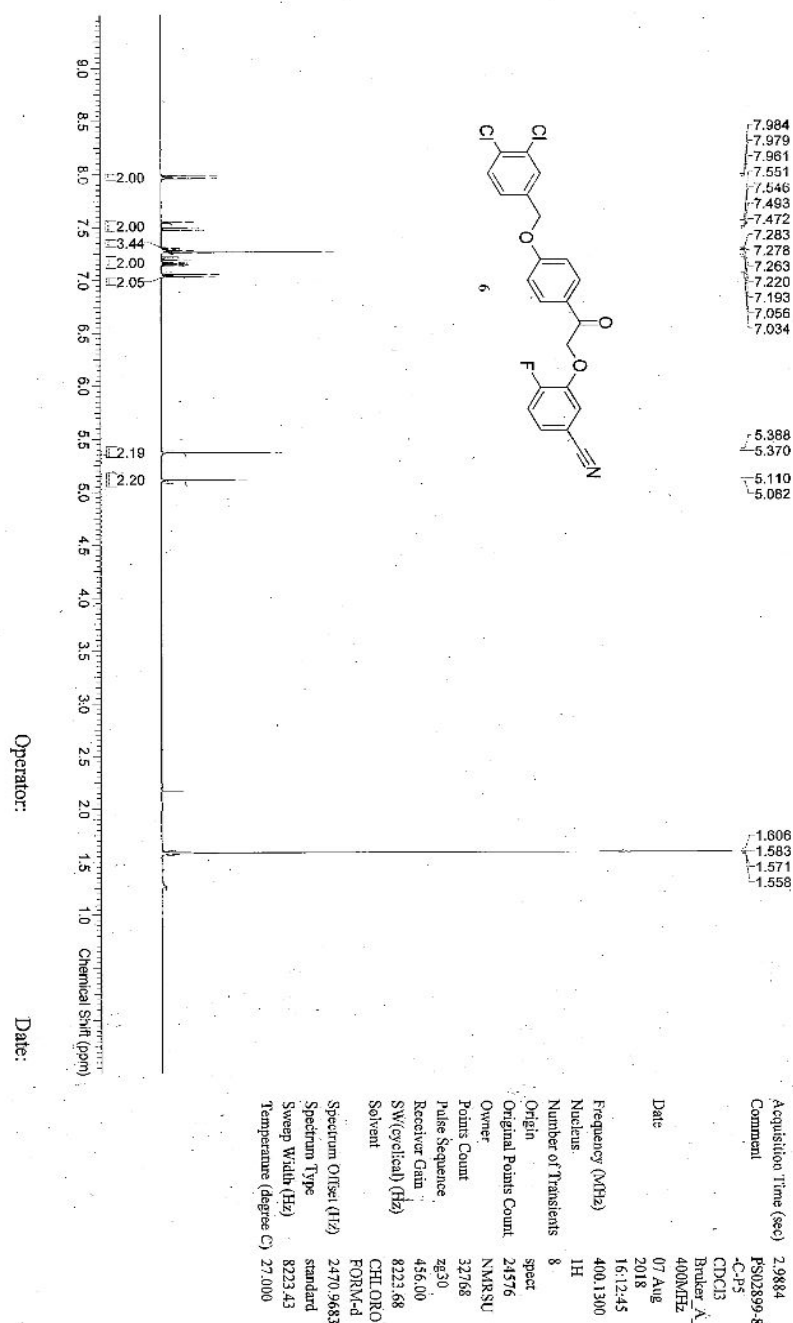



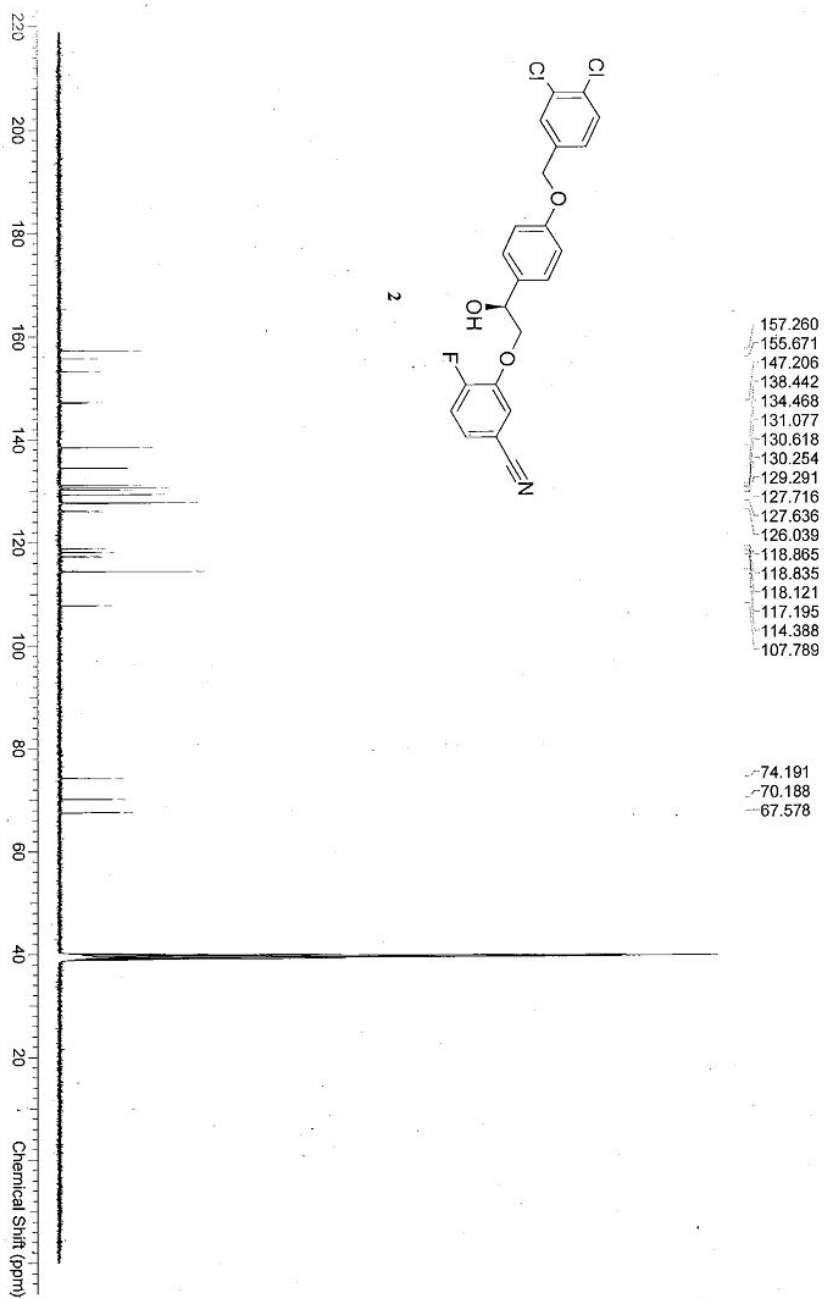

Operator:

Date:

Acquisition Time (sec) 1.3631  
 EL-H7169  
 Comment 2-055-D-P  
 DMSO  
 13C  
 Date 20 Mar 2019  
 Frequency (MHz) 100.6128  
 Nucleus 13C  
 Number of Transients 1024  
 Origin spect  
 Original Points Count 32768  
 Owner NMRSU  
 Points Count 32768  
 Pulse Sequence zgpg30  
 Receiver Gain 2050.00  
 SW (cyclical) (Hz) 24038.46  
 Solvent DMSO-d6  
 Spectrum Offset (Hz) 10010.499  
 0  
 Spectrum Type standard  
 Sweep Width (Hz) 24037.73  
 Temperature (degree C) 27.000

4) (*S*)-3-(2-(4-((3,4-dichlorobenzyl)oxy)-2-hydroxyethoxy)-4-fluorobenzonitrile (2)

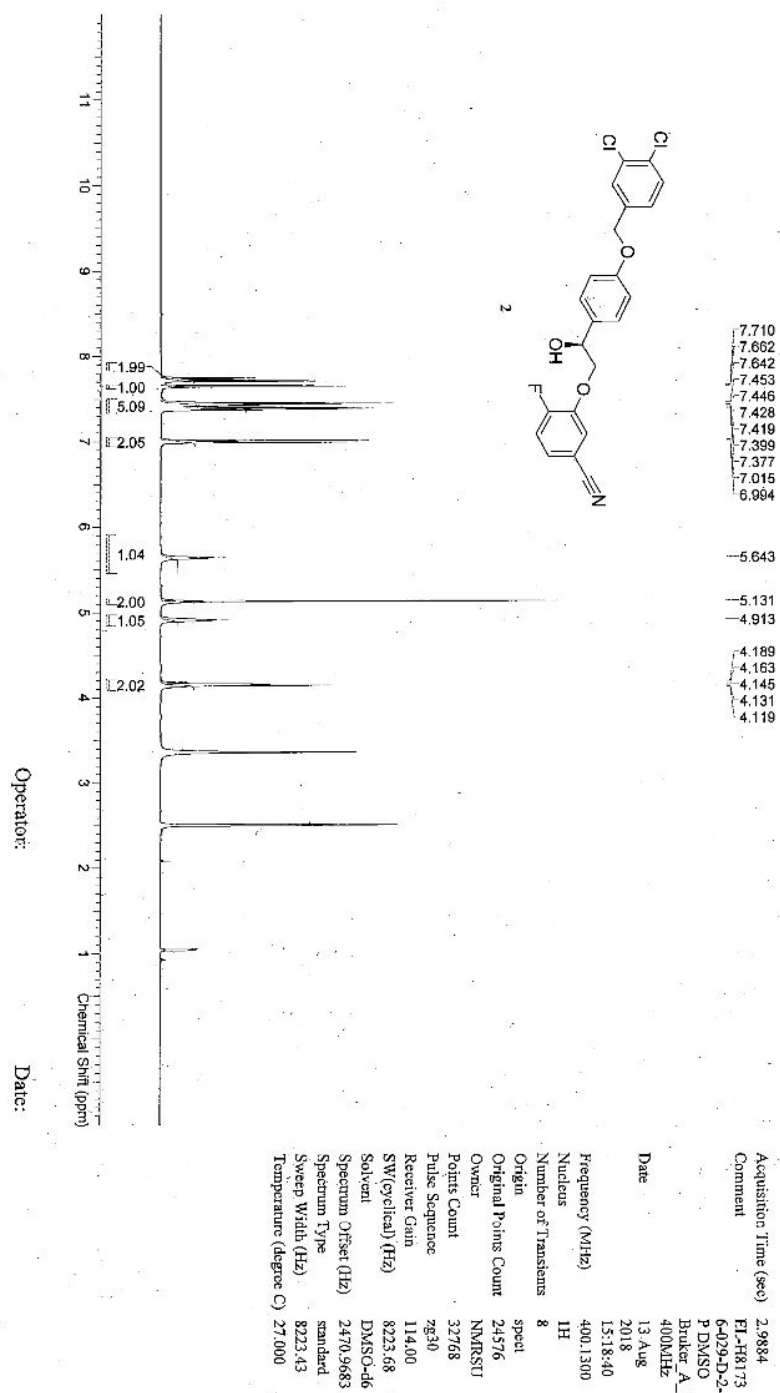

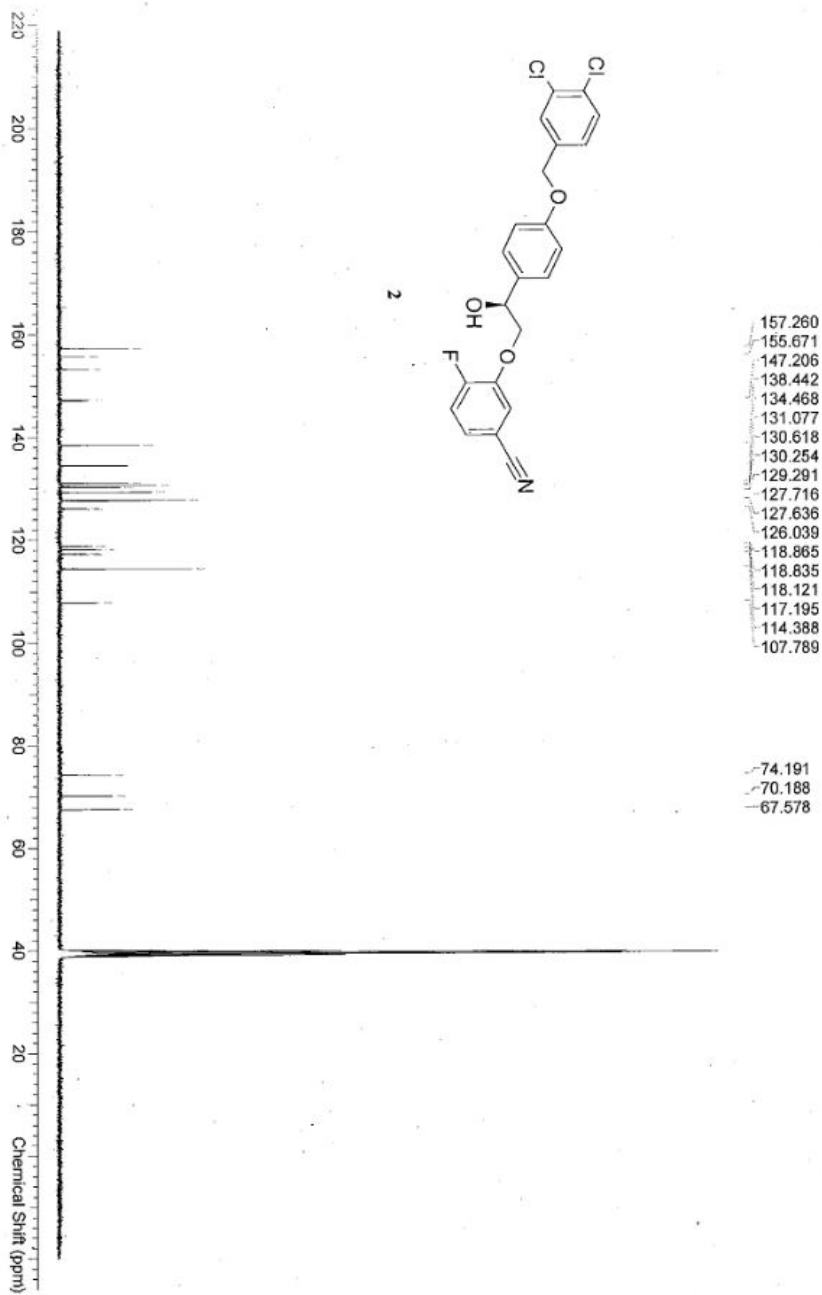

Operator:

Date:

Acquisition Time (sec) 1.3631  
 Comment EL-H7169  
 2-055-D-P  
 DMSO  
 13C  
 Date 20 Mar 2019  
 02:18:07  
 Frequency (MHz) 100.6128  
 Nucleus 13C  
 Number of Transients 1024  
 Origin spect  
 Original Points Count 32768  
 Owner NMRSU  
 Points Count 32768  
 Pulse Sequence zgpg30  
 Receiver Gain 2050.00  
 SW (cyclical) (Hz) 24038.46  
 Solvent DMSO-d6  
 Spectrum Offset (Hz) 10010.499  
 0  
 Spectrum Type standard  
 Sweep Width (Hz) 24037.73  
 Temperature (degree C) 27.000

5) (*S*)-2-(4-((3,4-dichlorobenzyl)oxy)phenyl)-2,3-dihydrobenzo  
[b][1,4]dioxine-6-carbonitrile (1)

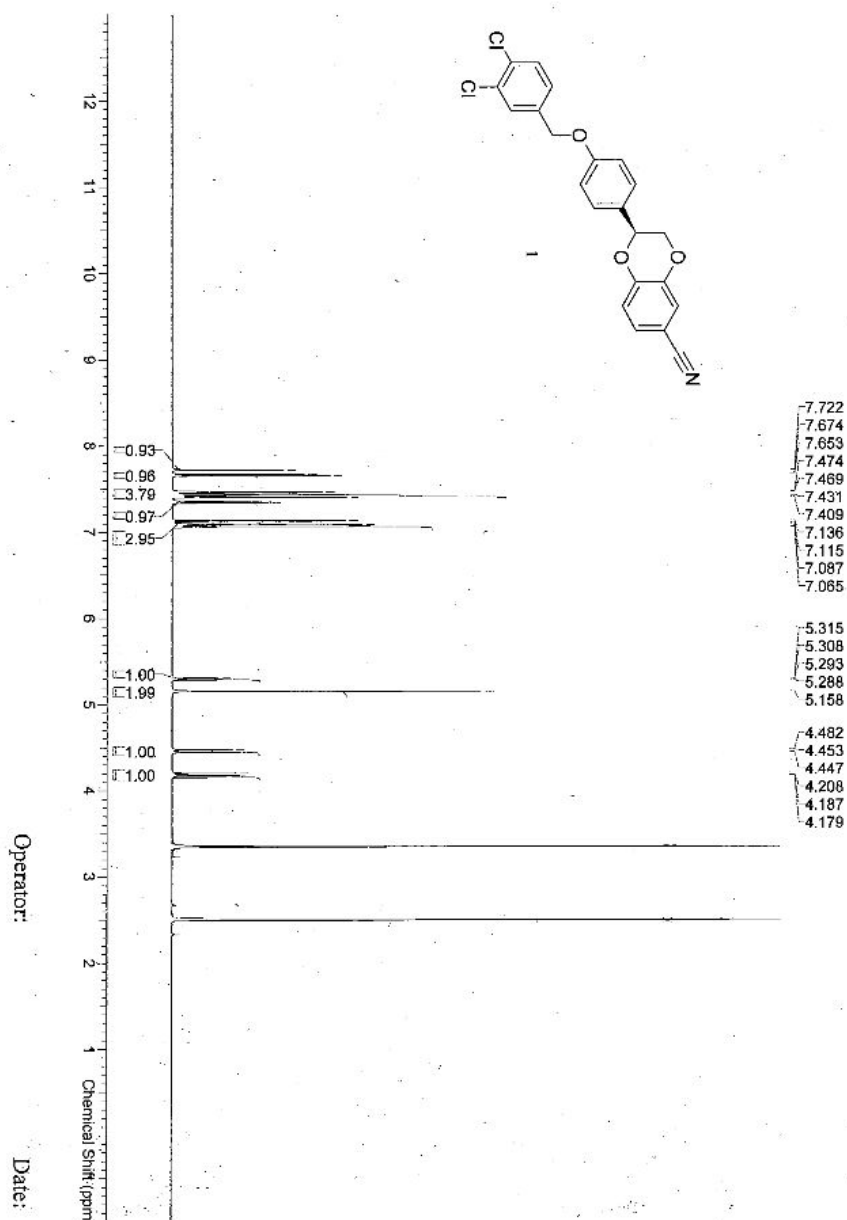

Acquisition Time (sec) 2.9884  
 Comment ps03162-5  
 -F-1-p2  
 DMSO  
 Bruker\_A  
 400MHz  
 30 Aug  
 2018  
 20:06:15  
 Frequency (MHz) 400.1300  
 Nucleus <sup>1</sup>H  
 Number of Transients 8  
 spect  
 Origin  
 Original Points Count 24576  
 Owner NMRSU  
 Points Count 32768  
 Pulse Sequence zg30  
 Receiver Gain 128.00  
 SW (cycles) (Hz) 8223.68  
 Solvent DMSO-d6  
 Spectrum Offset (Hz) 2470.9683  
 Spectrum Type standard  
 Sweep Width (Hz) 8223.43  
 Temperature (degree C) 27.000

Operator:

Date:

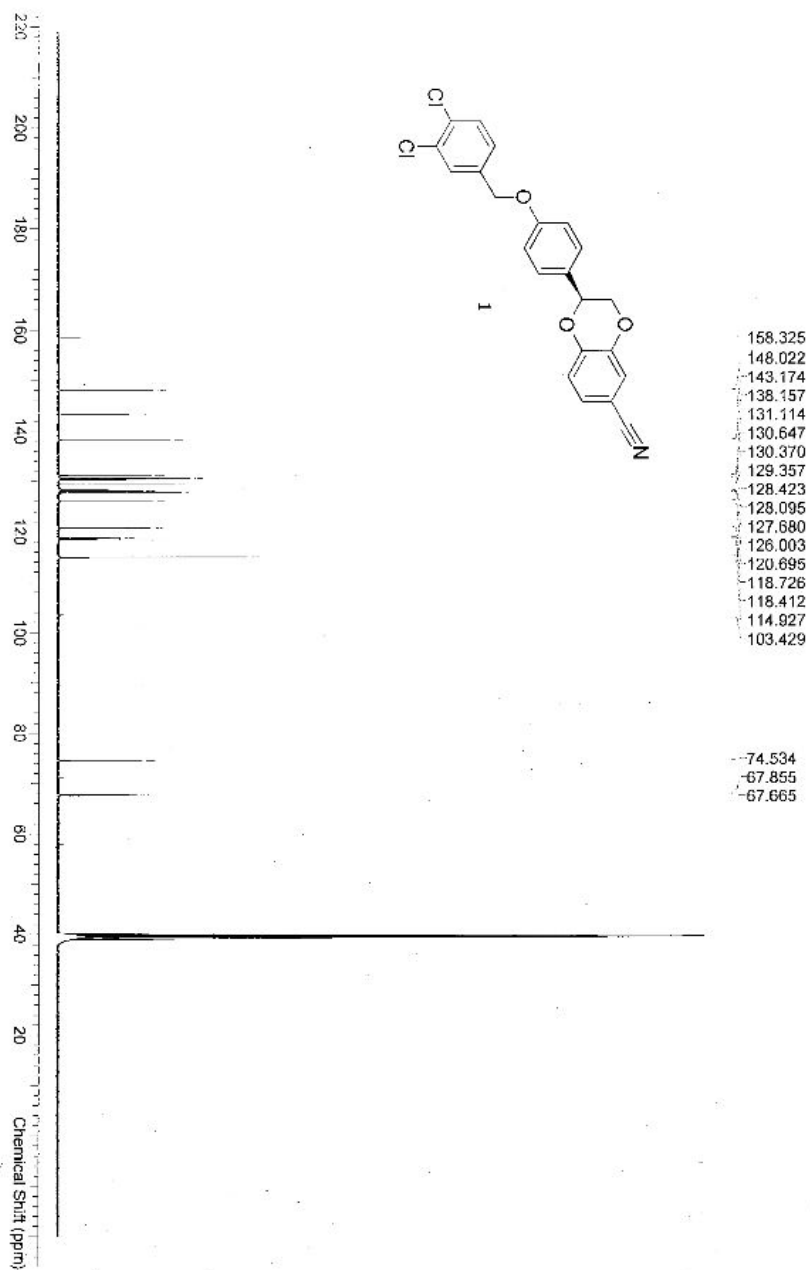

Operator:

Date:

Acquisition Time (sec) 1.3631  
 Comment EL-H17169  
 2-055-E-P  
 DMSO  
 13C  
 Date 20 Mar 2019  
 Frequency (MHz) 100.6128  
 Nucleus 13C  
 Number of Transients 3000  
 Origin spect  
 Original Points Count 32768  
 Owner NMRSU  
 Points Count 32768  
 Pulse Sequence zpg30  
 Receiver Gain 2050.00  
 SW(cyclical) (Hz) 24038.46  
 Solvent DMSO-d6  
 Spectrum Offset (Hz) 10010.499  
 Spectrum Type standard  
 Sweep Width (Hz) 24037.73  
 Temperature (degree C) 27.000

## 2. Chromatogram of the racemate and the enantiomerically pure compound

### 1) (S)-3-(2-(4-((3,4-dichlorobenzyl)oxy)-2-hydroxyethoxy)-4-fluorobenzonitrile (2)

#### HPLC REPORT

Sample Information @D:\Raw Data\EL-Process\2018\EL-V20171211A\Data\20180917\H81755-007-D-P2.lcd  
Project No.: EL-V20171211A  
Compound ID: C17121103-D  
Sample ID: H81755-007-D-P2  
Vial#: 9  
Injection Volume: 5 uL  
Test Items: Chiral  
Operator: GZh  
Notebook Reference: H81592-031

Data Filename: D:\Raw Data\EL-Process\2018\EL-V20171211A\Data\20180917\H81755-007-D-I  
Method Filename: D:\Raw Data\EL-Process\2018\EL-V20171211A\Method\AM-20%B-35C-1.0-30  
Date Acquired: 9/17/2018 4:00:24 PM  
Data Processed: 9/17/2018 4:30:26 PM

System Configuration @D:\Raw Data\EL-Process\2018\EL-V20171211A\Data\20180917\H81755-007-D-P2.lcd  
Instrument Name: ADS-HPLC-734  
Column Name: Chiralpak IC 250\*4.6mm 5 um ADS-HPC-25-505

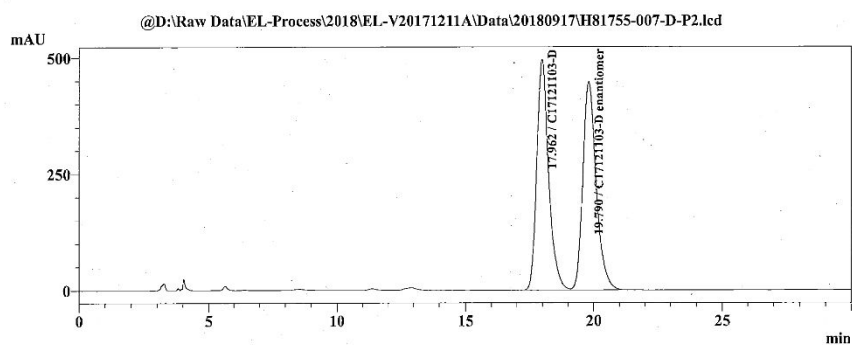

1 PDA Multi 1 / 225nm 4nm

PeakTable @D:\Raw Data\EL-Process\2018\EL-V20171211A\Data\20180917\H81755-007-D-P2.lcd

PDA Ch1 225nm 4nm

| No.   | Ret. Time | Name                   | Area     | Height | Area %   | Resolution | Tailing Factor | theoretical Plate |
|-------|-----------|------------------------|----------|--------|----------|------------|----------------|-------------------|
| 1     | 17.962    | C17121103-D            | 16016668 | 494973 | 49.9250  | 0.000      | 1.339          | 7539              |
| 2     | 19.790    | C17121103-D enantiomer | 16064810 | 447627 | 50.0750  | 2.098      | 1.341          | 7480              |
| Total |           |                        |          |        | 100.0000 |            |                |                   |

## HPLC REPORT

Sample Information @D:\...EL-Process\2018\EL-V20171211A\Data\20181102\PC02085-38-D-P-02.lcd

Project No.: EL-V20171211A  
 Compound ID: C17121103-D  
 Sample ID: PC02085-38-D-P  
 Vial#: 10  
 Injection Volume: 10 uL  
 Test Items: Chiral  
 Operator: GZh  
 Notebook Reference: H81592-050  
 Data Filename: D:\Raw Data\EL-Process\2018\EL-V20171211A\Data\20181102\PC02085-38-D-I  
 Method Filename: D:\Raw Data\EL-Process\2018\EL-V20171211A\Method\AM-20%B-35C-1.0-30  
 Date Acquired: 11/2/2018 6:45:09 PM  
 Data Processed: 11/5/2018 9:33:58 AM

System Configuration @D:\...EL-Process\2018\EL-V20171211A\Data\20181102\PC02085-38-D-P-02.lcd

Instrument Name: ADS-HPLC-734  
 Column Name: Chiralpak IC 250\*4.6mm 5 um ADS-HPC-25-505

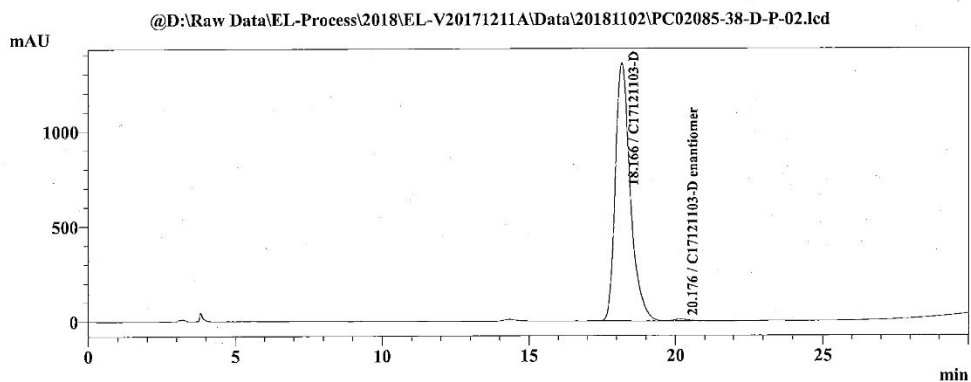

1 PDA Multi 1 / 225nm 4nm

PeakTable @D:\Raw Data\EL-Process\2018\EL-V20171211A\Data\20181102\PC02085-38-D-P-02.lcd

PDA Ch1 225nm 4nm

| Peak# | Ret. Time | Name                   | Area     | Height  | Area %   | Resolution | Tailing Factor | Theoretical Plate |
|-------|-----------|------------------------|----------|---------|----------|------------|----------------|-------------------|
| 1     | 18.166    | C17121103-D            | 48555041 | 1356244 | 99.2983  | 0.000      | 1.399          | 6554              |
| 2     | 20.176    | C17121103-D enantiomer | 343115   | 9153    | 0.7017   | 2.178      | 0.000          | 7249              |
| Total |           |                        |          |         | 100.0000 |            |                |                   |





2) (S)-2-(4-((3,4-dichlorobenzyl)oxy)phenyl)-2,3-dihydrobenzo  
[b][1,4]dioxine-6-carbonitrile (1)

## HPLC REPORT

Sample Information @D:\...2018\EL-V20171211A\Data\20180917\H81755-008-E-P3-IPA-IA868.lcd  
 Project No.: EL-V20171211A  
 Compound ID: C17121103-E  
 Sample ID: H81755-008-E-P3  
 Vial#: 6  
 Injection Volume: 5 uL  
 Test Items: Chiral  
 Operator: GZh  
 Notebook Reference: H81592-031

Data Filename: D:\Raw Data\EL-Process\2018\EL-V20171211A\Data\20180917\H81755-008-E-P3-IPA-IA868.lcd  
 Method Filename: D:\Raw Data\EL-Process\2018\EL-V20171211A\Method\AM-10%B-35C-1.0-30i  
 Date Acquired: 9/19/2018 11:11:49 AM  
 Data Processed: 9/21/2018 5:13:55 PM

System Configuration @D:\...2018\EL-V20171211A\Data\20180917\H81755-008-E-P3-IPA-IA868.lcd  
 Instrument Name: ADS-HPLC-734  
 Column Name: Chiralpak IA 250\*4.6mm ADS-HPLC-25-868

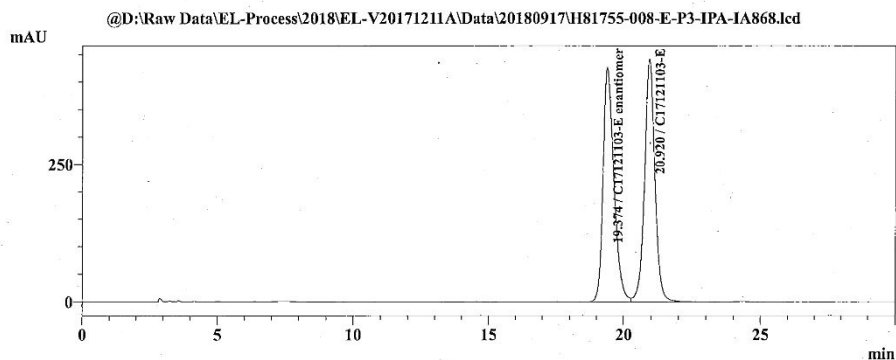

1 PDA Multi 1 / 225nm 4nm

PeakTable @D:\Raw Data\EL-Process\2018\EL-V20171211A\Data\20180917\H81755-008-E-P3-IPA-IA868.lcd  
 PDA Ch1 225nm 4nm

| No.   | Ret. Time | Name                   | Area     | Height | Area %   | Resolution | Tailing Factor | Theoretical Plate |
|-------|-----------|------------------------|----------|--------|----------|------------|----------------|-------------------|
| 1     | 19.374    | C17121103-E enantiomer | 11815408 | 427591 | 49.5638  | 0.000      | 1.444          | 11717             |
| 2     | 20.920    | C17121103-E            | 12023387 | 442149 | 50.4362  | 2.184      | 1.113          | 14312             |
| Total |           |                        |          |        | 100.0000 |            |                |                   |

## HPLC REPORT

**Sample Information** @D:\...EL-Process\2018\EL-V20171211A\Data\20181127\PS03110-33-E-dry-02.lcd  
**Project No.:** EL-V20171211A  
**Compound ID:** C17121103-E  
**Sample ID:** PS03110-33-E-dry  
**Vial# :** 24  
**Injection Volume:** 1 uL  
**Test Items:** Chiral  
**Operator:** GZh  
**Notebook Reference:** H81592-058  
**Data Filename:** D:\Raw Data\EL-Process\2018\EL-V20171211A\Data\20181127\PS03110-33-E-d  
**Method Filename:** D:\Raw Data\EL-Process\2018\EL-V20171211A\Method\AM-15%B-35C-1.0-30  
**Date Acquired:** 11/27/2018 4:10:08 PM  
**Data Processed:** 11/27/2018 5:01:43 PM

**System Configuration** @D:\...2018\EL-V20171211A\Data\20181127\PS03110-33-E-dry-02.lcd  
**Instrument Name:** ADS-HPLC-734

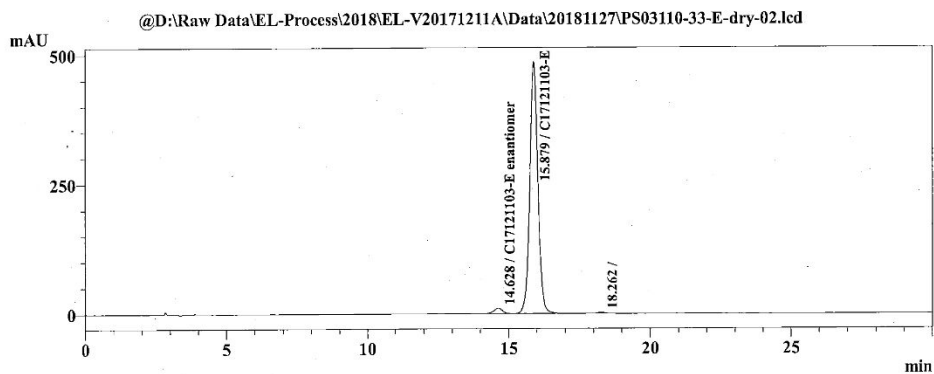

1 PDA Multi 1 / 225nm 4nm

PeakTable @D:\Raw Data\EL-Process\2018\EL-V20171211A\Data\20181127\PS03110-33-E-dry-02.lcd

PDA Ch1 225nm 4nm

| Peak# | Ret. Time | Name                   | Area    | Height | Area %   | Resolution | Tailing Factor | Theoretical Plate |
|-------|-----------|------------------------|---------|--------|----------|------------|----------------|-------------------|
| 1     | 14.628    | C17121103-E enantiomer | 220600  | 10331  | 2.1845   | 0.000      | 0.927          | 11082             |
| 2     | 15.879    | C17121103-E            | 9825908 | 485836 | 97.2999  | 2.308      | 1.057          | 14496             |
| 3     | 18.262    |                        | 52070   | 2463   | 0.5156   | 4.335      | 1.084          | 16305             |
| Total |           |                        |         |        | 100.0000 |            |                |                   |

### 3. Characterization of regioisomer 1b

The regioisomers **1** and **1b** could not be separated by flash column chromatography. Identification of the product regioisomer **1b** was achieved by product derivatization. The mixture of **1** and **1b** were converted to the aldehyde via treatment with DIBAL-H according to the procedure below. The isomers were separated by flash column chromatography and analyzed by 2D NMR spectroscopy to confirm the regioisomer **1b**.

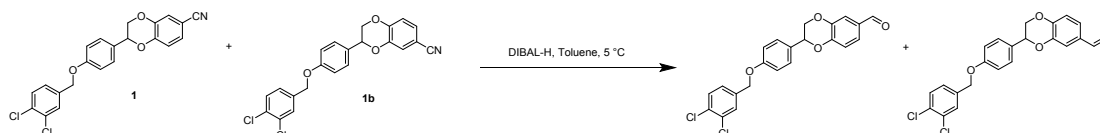

To a 100 mL 3-necked RBF was added the mixture of **1** and **1b** (3.6 g, 8.7 mmol, 1.0 eq.), toluene (28 mL, 8 mL/g). After the suspension was cooled to 5 °C, DIBAL-H (8 mL, 150 mmol, 1.5 eq., in 1M toluene solution) was added into the reaction mixture dropwise. The reaction mixture was stirred for 2 h at 5 °C. After which time, it was quenched with potassium tartrate (25 g, 20 wt%, aq.) and stirred at RT for 1h. The solid was removed by filtration through a pad of celite, then the organic layer was separated and washed with 2 M HCl. The volatiles were removed, and the residue was purified via column chromatography to separate the two product regioisomers.

Desired Regioisomer

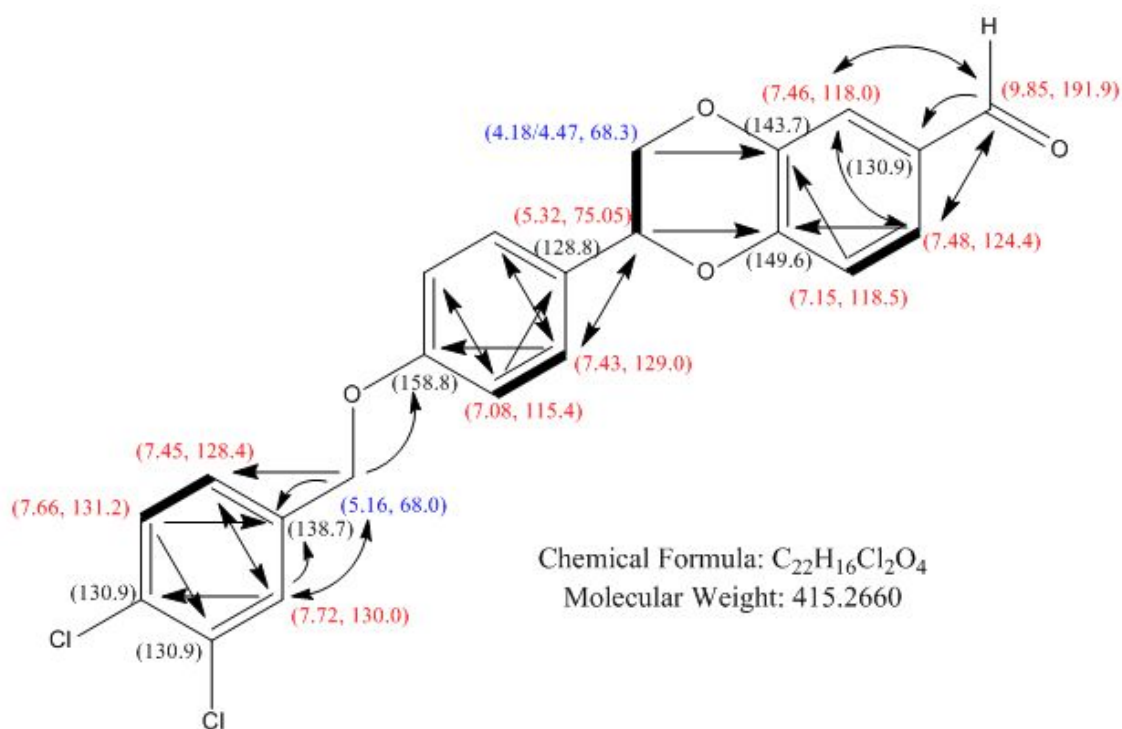

(#.##, ##.##) ( $^1H$ ,  $^{13}C$ ,  $^{19}F$ , or  $^{15}N$ ) chemical shift assignments based on a variety of 1D and 2D data

(#.##, ##.##) ( $^1H$ ,  $^{13}C$ ) chemical shift assignments of positive correlation in HSQC (with multiplicity editing) CH or  $CH_3$

(#.##, ##.##) ( $^1H$ ,  $^{13}C$ ) chemical shift assignments of negative correlation in HSQC (with multiplicity editing)  $CH_2$

—> Represents an HMBC long range correlation (LRC) was observed ( $^1H$  to  $^{13}C$ ) or ( $^1H$  to  $^{15}N$ )

—> Represents an COSY correlation was observed between proton resonances

$^1H$

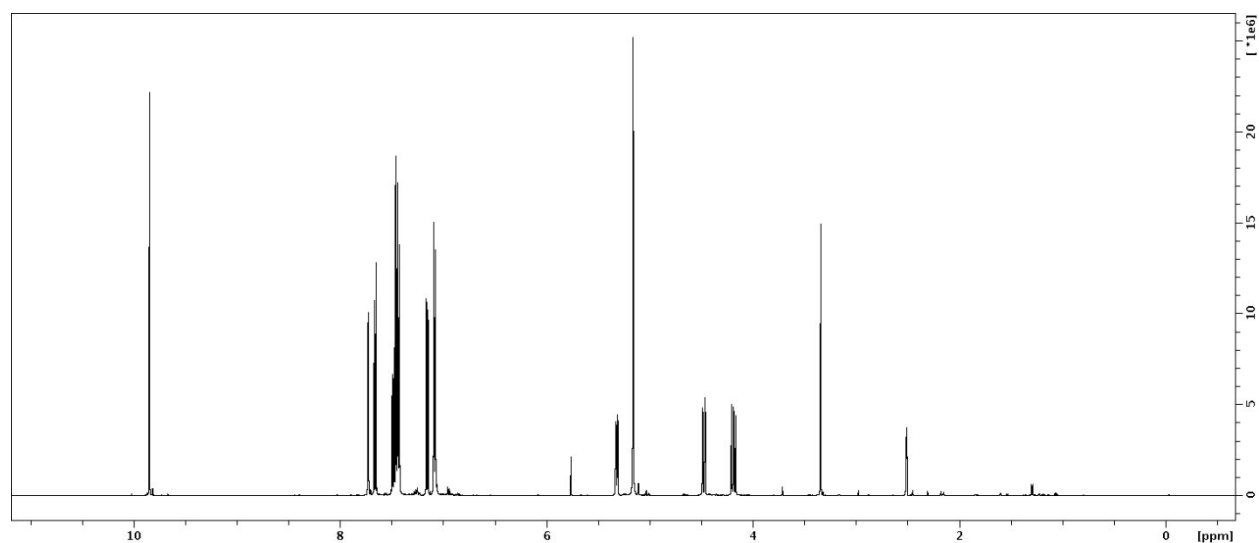

## HSQC

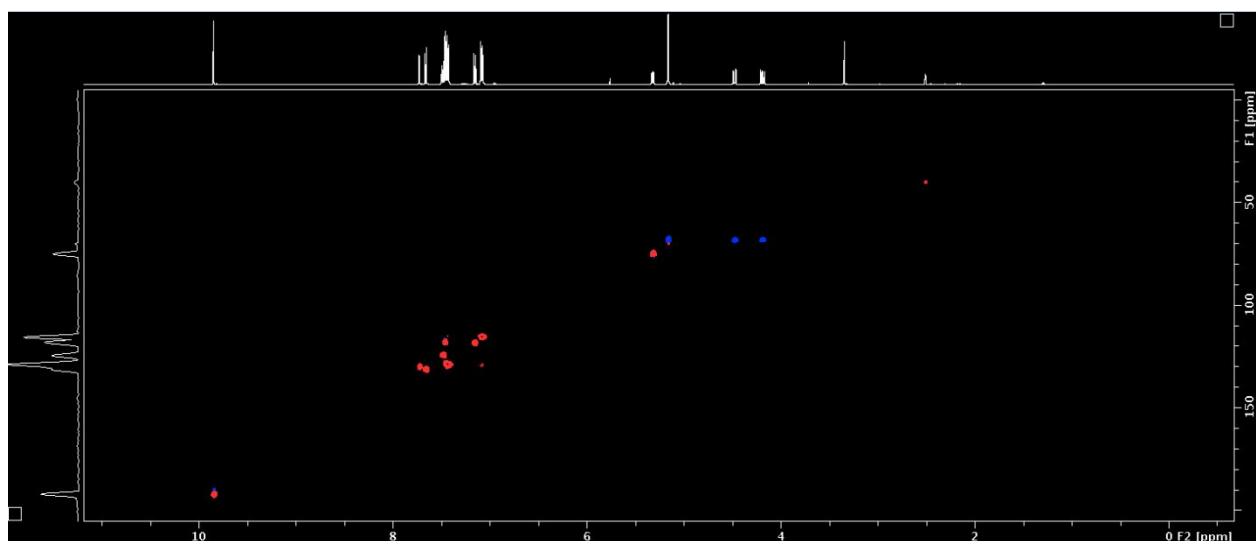

## HMBC

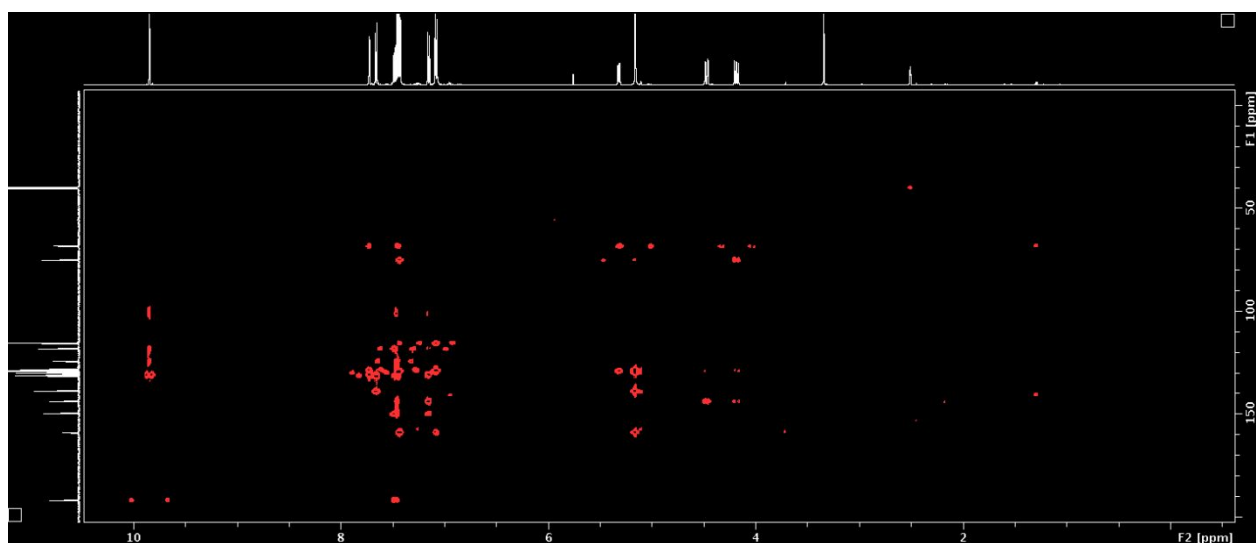

COSY

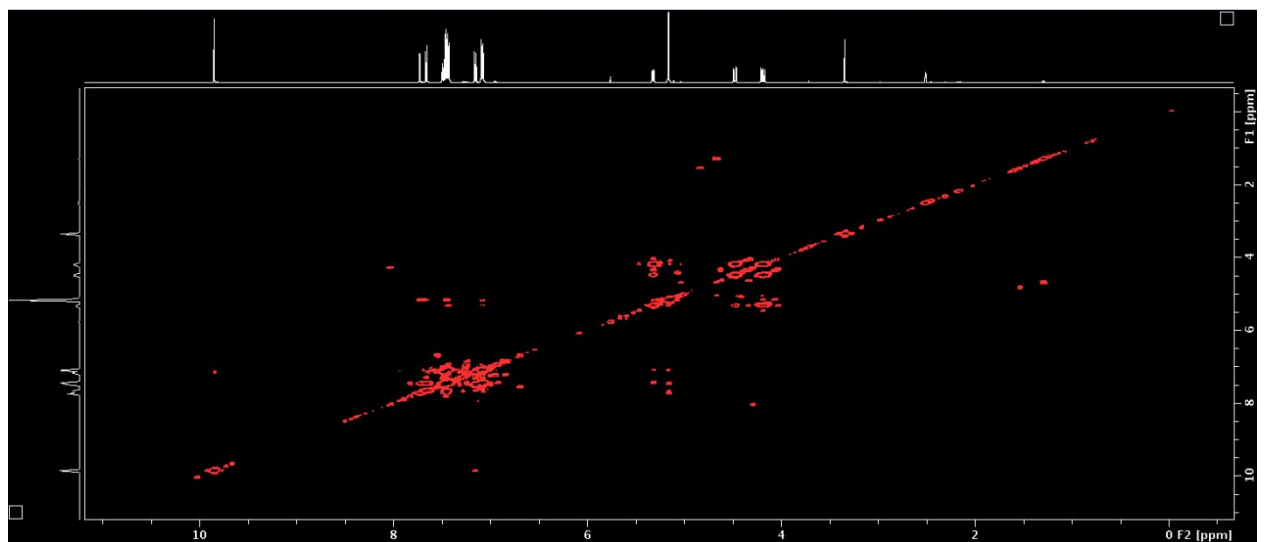

CARBON

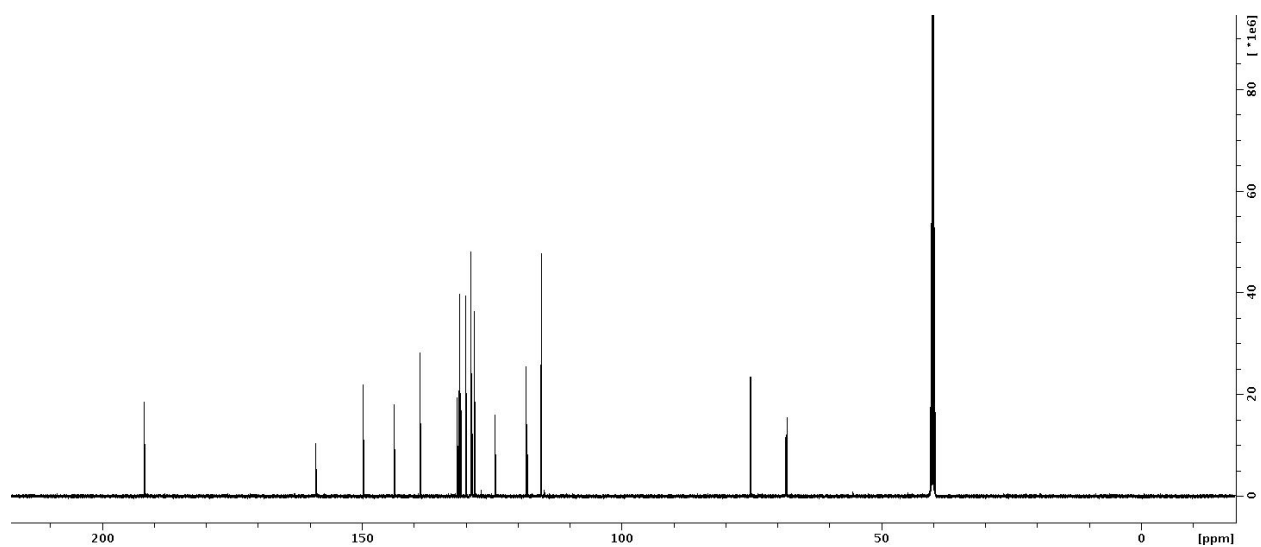

Undesired Regioisomer



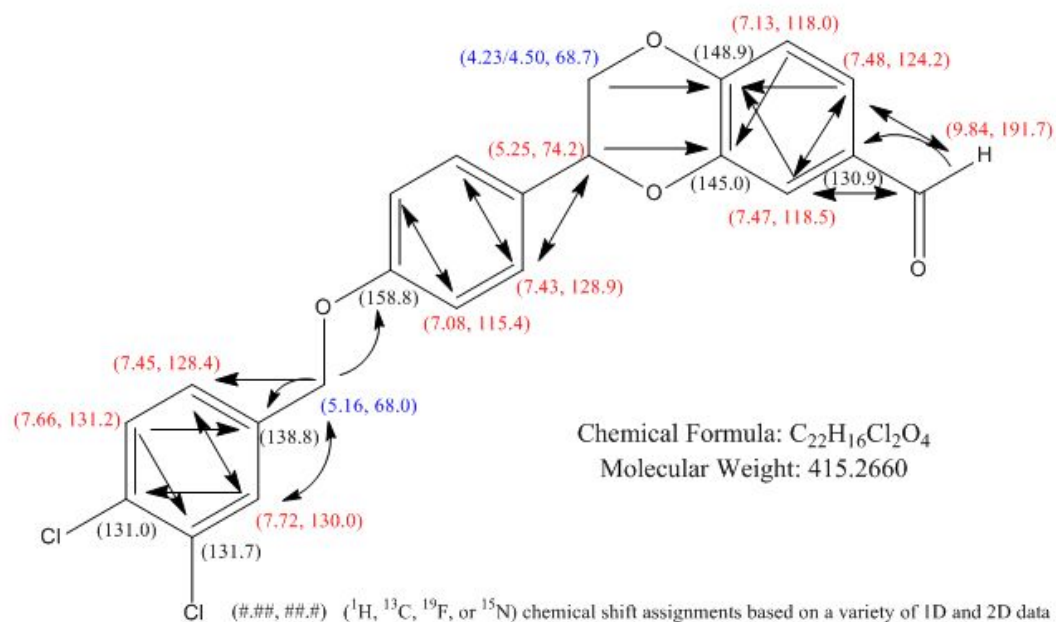

Chemical Formula:  $\text{C}_{22}\text{H}_{16}\text{Cl}_2\text{O}_4$   
Molecular Weight: 415.2660

- (###, ###) ( $^1\text{H}$ ,  $^{13}\text{C}$ ,  $^{19}\text{F}$ , or  $^{15}\text{N}$ ) chemical shift assignments based on a variety of 1D and 2D data  
 (###, ###) ( $^1\text{H}$ ,  $^{13}\text{C}$ ) chemical shift assignments of positive correlation in HSQC (with multiplicity editing) CH or  $\text{CH}_3$   
 (###, ###) ( $^1\text{H}$ ,  $^{13}\text{C}$ ) chemical shift assignments of negative correlation in HSQC (with multiplicity editing)  $\text{CH}_2$   
 ————— Represents an HMBC long range correlation (LRC) was observed ( $^1\text{H}$  to  $^{13}\text{C}$ ) or ( $^1\text{H}$  to  $^{15}\text{N}$ )  
 - - - - - Represents an COSY correlation was observed between proton resonances

$^1\text{H}$

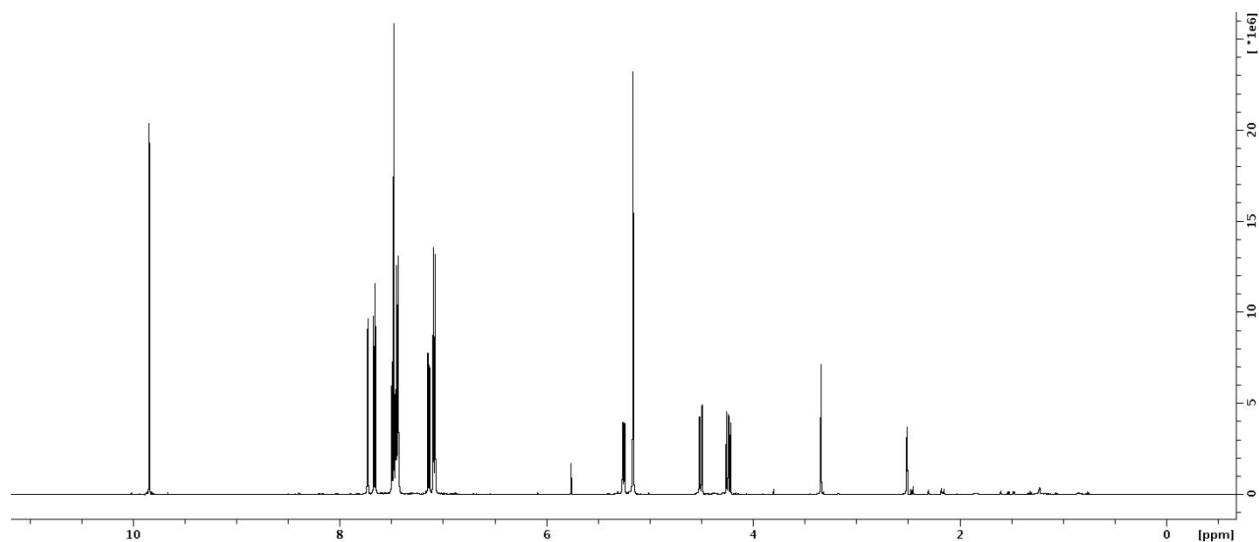

HSQC

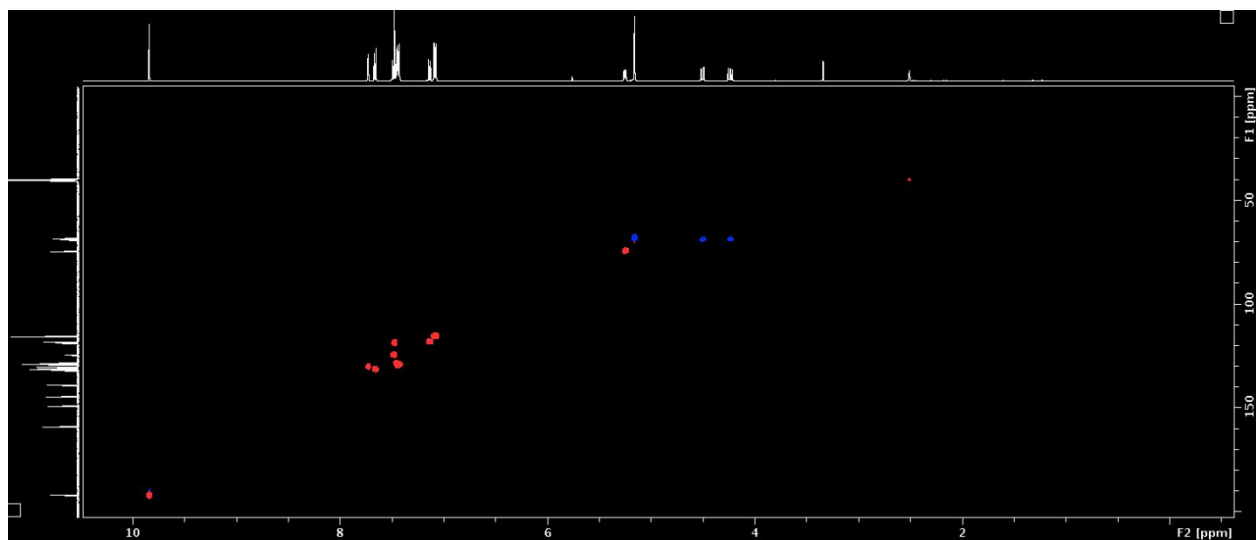

HMBC

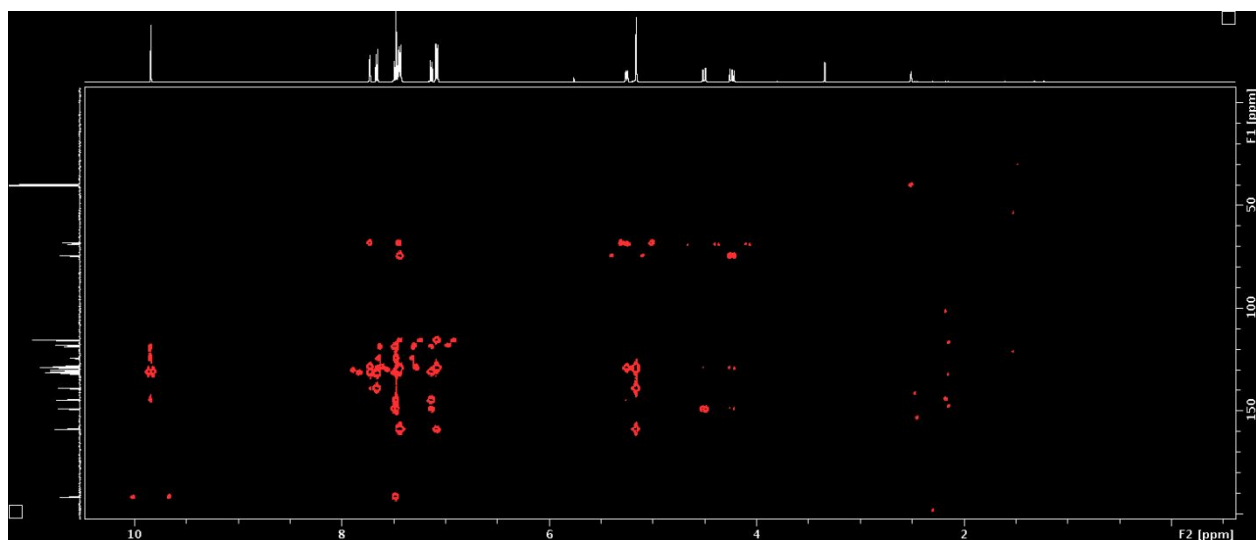

CARBON

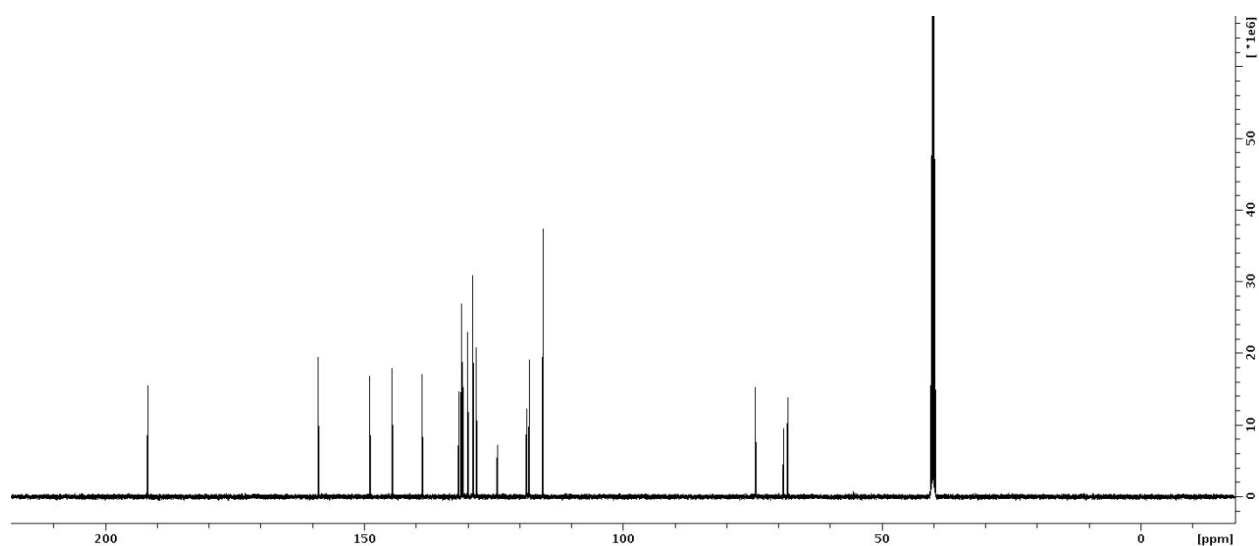

#### 4. Safety Analysis of the high temperature S<sub>N</sub>Ar Cyclization

##### Conditions

DSC was completed on a representative reaction mixture for the S<sub>N</sub>Ar cyclization of **2**. The reaction mixture consisted of **2**, in 10 mL/mg of diglyme with 3.2 equivalent of DBU.

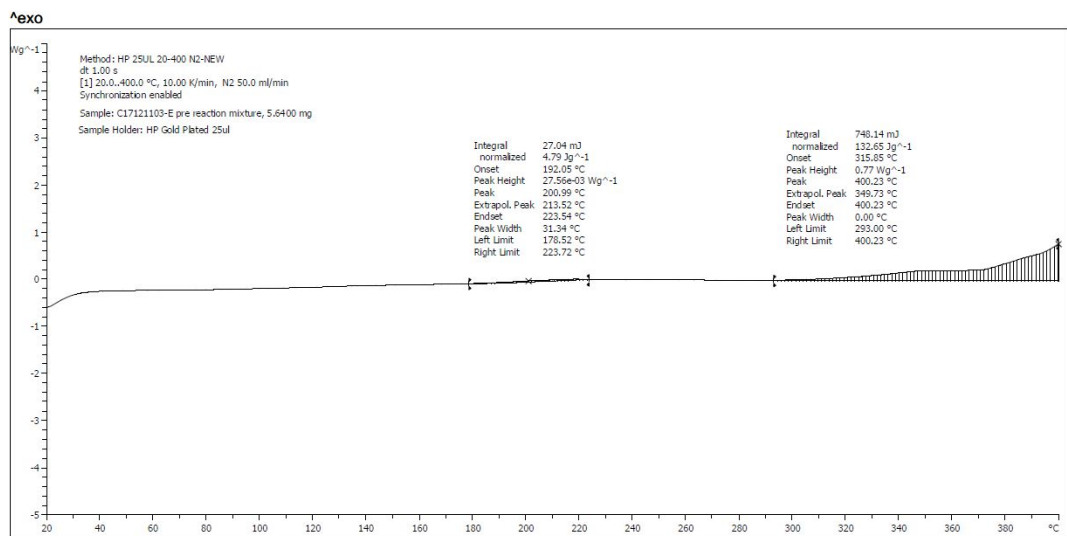

## 5. Port Connector reactors for Small Scale Screening of High Temperature Conditions

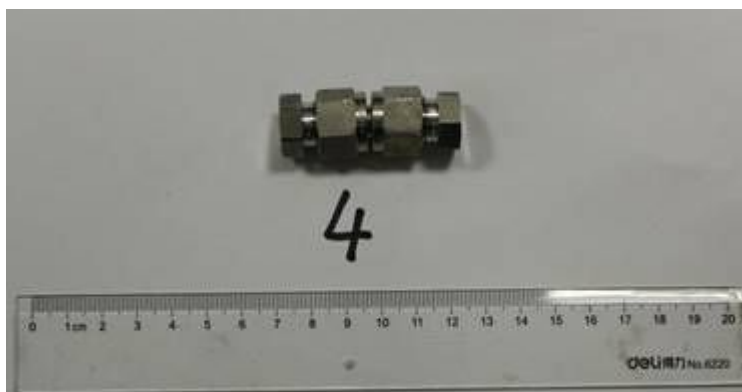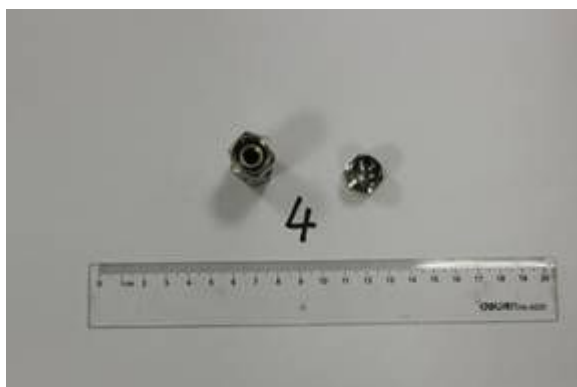

Swagelok port connector reactors are sealed and heated in a GC oven.

These small port connector reactors do not have pressure safety relief. Therefore, an internal safety group in each organization should set safety guidelines based on volume, thermal expansion, % liquid filled, and potential thermal decomposition to prevent port connector rupture, and shielding for protection in the event of rupture.
